# Supplementary material for: Tibetan red deer (Cervus canadensis wallichi) diet composition patterns and associations during lean seasons in Tibet, China
Source: PeerJ journal article supplement (doi:10.7717/peerj.18614), 2024-11-27
Supplement: FoodAbundancein2022.xlsx [file FoodAbundancein2022.xlsx]

## Sheet: FoodAbundancein2022
Plant	1	2	3	4	5	6	7	8	9	10	11	12	13	14	15	16	17	18	19	20	21	22	23	24	25	26	27	28	29	30	31	32	33	34	35	36	37	38	39	40	41	42	43	44	45	46	47	48	49
A.wellbyi	3	1	2	5	6	2	14	5	3	1	10	3	7	0	6	5	6	0	4	4	3	0	1	3	6	1	7	4	6	4	7	3	7	4	3	9	6	3	1	4	6	2	5	4	2	13	4	6	2
L.rumicifolia	4	5	0	6	3	2	3	3	2	3	0	1	0	1	1	4	3	1	4	0	5	1	5	3	4	8	5	2	0	7	10	4	4	7	6	5	5	10	8	3	2	7	5	6	0	1	2	3	1
P.tortuosum	5	7	8	10	6	1	14	24	9	3	7	9	6	2	14	8	10	4	10	11	7	2	15	14	19	22	7	9	9	11	2	4	11	8	6	10	12	3	12	15	10	8	16	10	7	5	6	14	5
C.littledalei	35	21	18	10	9	30	20	15	6	12	9	20	7	10	11	15	16	11	9	4	7	24	8	9	4	7	0	0	1	24	3	2	2	13	4	10	15	9	6	16	8	14	20	17	15	13	29	37	24
A.rivularis	0	2	2	5	0	0	10	8	5	5	6	13	3	4	0	9	5	3	6	1	2	2	4	3	5	0	8	1	2	10	3	5	4	5	2	0	6	15	8	4	3	4	5	8	2	5	3	10	5
D.parvifolia	5	8	4	12	9	2	6	5	5	2	2	7	8	3	2	3	2	4	8	2	11	8	0	5	6	8	15	4	1	14	13	7	9	6	9	5	6	22	22	2	10	8	6	8	12	5	3	10	6
B.temolaica	8	5	4	44	4	4	24	24	11	11	11	5	6	6	6	21	4	6	7	6	9	9	12	17	17	15	5	9	3	12	7	11	11	13	7	15	25	6	14	12	7	10	11	11	21	24	30	24	7
R.macrophylla	1	3	3	15	0	1	8	2	3	2	4	1	0	1	3	6	3	0	3	5	3	5	79	109	101	129	8	9	16	13	8	3	2	0	0	0	4	3	2	2	3	2	1	3	3	7	0	0	1
J.pingii	0	3	28	62	59	25	15	38	16	4	4	3	19	11	31	26	17	64	52	24	73	34	109	102	99	74	55	79	62	62	45	42	40	55	48	43	23	96	67	60	24	43	43	51	16	9	5	9	24
C.ulicinum	1	3	3	2	4	7	10	5	4	3	2	8	2	4	2	7	5	9	5	2	4	7	9	1	2	5	8	1	0	2	3	2	2	3	2	4	4	7	3	3	2	5	3	3	3	5	1	3	3
S.alpina	1	6	1	4	3	5	1	3	2	0	5	0	0	2	3	4	6	2	4	8	14	6	2	0	0	0	3	1	4	5	0	1	6	5	4	14	9	11	28	6	11	2	4	0	3	3	3	6	5
R.fragariflorum	3	7	29	4	35	29	31	41	60	66	67	60	66	51	34	38	24	32	27	58	17	32	4	1	1	1	47	45	46	11	36	73	38	16	13	6	10	32	13	50	28	36	28	33	30	41	6	12	13
R.nivale	6	8	26	3	5	7	3	7	5	5	5	0	2	9	4	11	3	0	5	15	4	5	1	1	1	3	14	13	7	0	7	2	3	5	6	7	5	4	1	2	4	3	5	9	2	0	2	0	3
S.angustata	0	0	0	1	0	1	0	1	1	0	0	3	0	0	0	1	1	0	0	0	1	0	0	0	0	0	1	1	0	0	0	0	2	0	0	1	2	1	0	1	3	0	0	0	0	0	0	1	0
H.thibetana	12	21	21	3	4	4	9	20	18	16	14	27	19	11	11	17	36	10	13	17	8	27	16	5	18	3	20	7	13	14	11	25	23	14	22	14	12	2	2	7	26	21	21	29	40	17	9	8	17
C.versicolor	5	5	7	7	16	10	22	20	11	20	8	15	16	21	20	19	21	6	18	21	15	20	10	9	3	3	12	18	13	17	14	11	12	6	10	17	19	4	10	15	21	13	12	11	12	21	14	21	16
Salix spp.	196	180	141	103	126	162	97	56	119	133	125	93	137	152	148	100	120	145	116	119	114	108	14	10	3	4	78	93	105	62	120	92	109	120	148	129	119	61	98	78	121	111	100	90	120	125	161	107	153
Poaceae	14	12	1	3	10	6	8	17	13	13	17	28	0	8	4	4	14	3	1	2	3	7	7	3	8	7	3	2	12	28	9	11	12	16	10	11	18	8	3	14	5	10	9	7	11	5	21	26	11
B.costata	0	1	1	1	1	0	2	0	2	0	0	0	0	1	0	0	1	0	0	0	0	0	1	0	0	1	0	0	0	0	1	0	1	1	0	0	0	0	0	0	3	0	1	0	0	0	0	1	0
unknown	1	2	1	0	0	2	3	6	5	1	4	4	2	3	0	2	3	0	8	1	0	3	3	5	3	9	4	2	0	4	1	2	2	3	0	0	0	3	2	6	3	1	5	0	1	1	1	2	4
[truncated: 1 more columns]
