# Supplementary material for: Tibetan red deer (Cervus canadensis wallichi) diet composition patterns and associations during lean seasons in Tibet, China
Source: PeerJ journal article supplement (doi:10.7717/peerj.18614), 2024-11-27
Supplement: frequencesinplots2021.xlsx [file frequencesinplots2021.xlsx]

## Sheet: FoodAbundancein2021
Plant	1	2	3	4	5	6	7	8	9	10	11	12	13	14	15	16	17	18	19	20	21	22	23	24	25	26	27	28	29	30	31	32	33	34	35	36	37	38	39
D.parvifolia	22	4	12	10	11	26	3	12	2	2	1	1	0	20	15	3	3	7	2	11	47	5	5	13	22	3	5	0	12	6	5	3	2	1	8	0	6	2	3
B.temolaica	10	45	39	11	8	6	18	5	6	3	1	4	6	10	5	7	6	4	2	12	5	0	1	6	5	1	8	0	1	6	2	5	1	0	3	0	1	16	11
A.wellbyi	18	6	15	1	1	4	8	10	9	0	0	0	5	3	5	1	2	1	0	0	0	0	1	1	9	7	3	2	11	15	11	7	12	2	9	2	15	4	0
R.macrophylla	3	2	10	1	0	1	7	0	1	2	0	4	4	12	1	5	3	2	0	1	3	2	2	2	2	1	2	2	1	2	0	1	0	1	2	4	0	0	2
J.pingii	78	61	10	76	21	27	26	62	25	26	19	46	19	56	63	51	6	71	52	42	87	90	22	52	42	74	14	23	17	11	93	24	4	34	35	26	13	32	4
C.ulicinum	1	0	23	1	4	1	2	2	1	1	0	6	1	4	4	1	0	0	0	1	1	7	5	6	7	1	1	4	5	1	2	3	4	6	0	4	0	0	0
L.rumicifolia	7	10	35	13	4	31	4	6	1	0	1	0	2	2	2	5	0	4	2	1	7	0	4	3	8	3	6	1	3	4	5	0	5	2	4	0	0	1	16
S.alpina	2	3	26	7	5	4	8	10	1	2	5	2	1	8	6	3	0	1	2	20	9	16	13	7	10	2	0	1	20	10	1	7	5	10	2	4	0	0	1
R.fragariiflorum	43	40	18	44	20	40	35	15	46	52	48	63	60	70	25	73	136	68	50	119	49	120	64	95	72	32	94	41	52	17	34	55	39	12	20	93	41	35	14
S.angustata	0	1	2	0	0	0	2	1	1	0	0	1	0	1	1	0	0	0	0	0	1	0	0	0	0	0	0	0	0	0	0	0	0	0	0	0	1	0	1
Poaceae	10	5	19	8	11	29	11	34	4	8	17	12	1	3	11	10	3	8	2	3	4	4	7	7	2	5	11	12	21	61	13	10	30	35	26	14	17	6	3
P.tortuosum	24	10	14	10	2	7	6	9	2	4	0	12	2	1	5	11	7	14	26	15	4	14	7	1	5	4	9	9	0	22	2	4	9	2	5	11	5	5	3
B.costata	9	2	1	0	1	3	11	1	6	0	0	0	1	2	1	0	1	0	1	0	0	0	0	0	0	0	2	2	1	0	0	1	1	0	0	0	0	1	2
C.littledalei	2	1	1	3	0	0	2	5	0	0	3	9	1	0	2	0	0	1	2	0	0	0	0	0	0	0	0	0	1	3	0	4	1	1	3	2	1	0	2
A.rivularis	10	9	23	8	18	11	3	5	4	2	1	0	2	4	1	4	0	0	4	2	3	0	7	7	4	6	6	1	1	6	10	5	4	2	4	2	0	0	9
Salix spp.	49	90	33	83	186	77	129	108	187	190	187	128	188	98	140	120	132	111	148	71	68	38	161	98	104	157	115	199	118	90	112	163	162	181	170	123	193	191	219
unknown	12	11	19	24	8	33	25	15	4	8	17	12	7	6	13	6	1	8	7	2	12	4	1	2	8	4	24	3	36	46	10	8	21	11	9	15	7	7	10
